# Supplementary material
Source: PubMed Central journal article supplement (PMC2823580)
Supplement: jcs.050682_1.pdf [file jcs.050682_1.pdf]

**Table S1. Worm strains**

| Name   | Genotype                                                                                                                                                    | Origin                    |
|--------|-------------------------------------------------------------------------------------------------------------------------------------------------------------|---------------------------|
| OC4    | <i>zyg-1(it4)/ mIn1[mIs14 dpy-10(e128)] II</i>                                                                                                              | This study                |
| OC333  | <i>zyg-1(it4) unc-4(e120) / mIn1[mIs14 dpy-10(e128)] II</i>                                                                                                 | This study                |
| OC317  | <i>zyg-1(it4) unc-4(e120) / mIn1[mIs14 dpy-10(e128)] II; ltIs37 [pAA64: unc-119 (+) pie-1-mcherry-his-58]; ltIs25 [pAZ132: unc-119 (+) pie-1-gfp-tba-2]</i> | This study                |
| OC294  | <i>zyg-1(it4) unc-4(e120)/ mIn1[mIs14 dpy-10(e128)] II; him-8(e1489)IV</i>                                                                                  | This study                |
| OC173  | <i>zyg-1(it29) unc-4(e120)/ mIn1[mIs14 dpy-10(e128)] II</i>                                                                                                 | This study                |
| OC379  | <i>zyg-1(it29)/ mIn1[mIs14 dpy-10(e128)] II</i>                                                                                                             | This study                |
| OC195  | <i>zyg-1(it29) unc-4(e220)/ mIn1[mIs14 dpy-10(e128)] II; ojIs2 [pLM6:unc-119(+)] pie-1-gfp-tba-1]</i>                                                       | This study                |
| OC287  | <i>zyg-1(it29) unc-4(e120)/ mIn1[mIs14 dpy-10(e128)] II; him-8(e1489)IV</i>                                                                                 | This study                |
| OC332  | <i>zyg-1(it37) unc-4(e120)/ mIn1[mIs14 dpy-10(e128)] II</i>                                                                                                 | This study                |
| OC254  | <i>zyg-1(it37) unc-4(e220)/ mIn1[mIs14 dpy-10(e128)] II; ojIs2 [pLM6:unc-119(+)] pie-1-gfp-tba-1]</i>                                                       | This study                |
| OC263  | <i>zyg-1(it37) unc-4)/ mIn1[mIs14 dpy-10(e128)] II; bsIs2 [pCK6.1: unc-119(+)] pie-1-gfp-spd-2]</i>                                                         | This study                |
| OC284  | <i>zyg-1(it37) unc-4(e120)/ mIn1[mIs14 dpy-10(e128)] II; him-8(e1489)IV</i>                                                                                 | This study                |
| OD57   | <i>unc-119(ed3) III; ltIs37 [pAA64: unc-119 (+) pie-1-mcherry-his-58]; ltIs25 [pAZ132: unc-119 (+) pie-1-gfp-tba-2]</i>                                     | (McNally et al., 2006)    |
| OC341  | <i>unc-119(ed4) III; bsIs8[pMS5.1:unc-119(+)] pie-1-gfp-zyg-1C-terminus]</i>                                                                                | This study                |
| OC373  | <i>unc-119(ed4) III; bsIs9[pMS8.1:unc-119(+)] pie-1-gfp-zyg-1kinase domain]</i>                                                                             | This study                |
| CB1489 | <i>him-8(e1489) IV</i>                                                                                                                                      | (Hodgkin et al., 1979)    |
| JK574  | <i>fog-2(q71) V</i>                                                                                                                                         | (Schedl and Kimble, 1988) |
| OC297  | <i>fog-2(q71) V; ltIs37 [pAA64: unc-119 (+) pie-1-mcherry-his-58]; ltIs25 [pAZ132: unc-119 (+) pie-1-gfp-tba-2]</i>                                         | This study                |
| JK816  | <i>fem-3(q20gf)IV</i>                                                                                                                                       | (Barton et al., 1987)     |
| WH166  | <i>zyg-1(it4) unc-4(e120)/mnC1 II; fem-3(q20gf) IV</i>                                                                                                      | This study                |
| WH165  | <i>zyg-1(it29), unc-4(e120)/mnC1 II; fem-3(q20gf) IV</i>                                                                                                    | This study                |
| WH168  | <i>zyg-1(it37) unc-4(e120)/mnC1 II; fem-3(q20gf) IV</i>                                                                                                     | This study                |
| OC271  | <i>pPh-4.1(tm1598)/ hT2[qIs48] (I;III)</i>                                                                                                                  | This study                |
| OC293  | <i>pPh-4.1(tm1598)/ hT2[qIs48] (I;III); him-8(e1489) IV</i>                                                                                                 | This study                |
